# Supplementary material for: Potential energy interpolation with target-customized weighting coordinates: application to excited-state dynamics of photoactive yellow protein chromophore in water
Source: Royal Society of Chemistry journal article supplement (doi:10.1039/d3cp05643k), 2024-01-01
Supplement: d3cp05643k1.pdf [file d3cp05643k1.pdf]

## Electronic Supplementary Information

# **Potential Energy Interpolation with Target-Customized Weighting Coordinates: Application to Excited-State Dynamics of Photoactive Yellow Protein Chromophore in Water**

Seung Soo Kim and Young Min Rhee\*

*Department of Chemistry, Korea Advanced Institute of Science and Technology (KAIST),*

*Daejeon 34141, Korea*

\*E-mail: [yrrhee@kaist.ac.kr](mailto:yrrhee@kaist.ac.kr)

### Supporting Text: Determining the confidence radii for two-part weight functions

In line with an earlier report,<sup>1</sup> the confidence radii for the two-part weight functions, namely  $\text{crad}(n)$  in eq 7 of the main text, can be assigned by adopting a Bayesian analysis to the interpolation database. In brief, the Bayesian analysis statistically estimates the confidence radii, each of which is the distance where the expansion error at a given data point does not exceed a tolerance value,  $E_{\text{tol}}$ . The estimation is from the nearest  $M$  neighboring configurations, usually collected from other interpolation data points. Within a simple assumption to the relationship between the distance from the data point and its expansion error, the Bayesian confidence radius for a given data point can be written as

$$\text{crad}(n)^{-6} = \frac{1}{M} \sum_{l=1}^M \frac{[T_n(\mathbf{Z}_l^{\text{nei}(n)}) - U_l^{\text{nei}(n)}]^2}{E_{\text{tol}}^2 [d_n(\mathbf{X}_l^{\text{nei}(n)})]^6} \quad (\text{S1})$$

where  $\mathbf{Z}_l^{\text{nei}(n)}$  and  $\mathbf{X}_l^{\text{nei}(n)}$  are the geometry of the  $l$ -th neighboring configuration for the  $n$ -th data point geometry, as represented in the Z-matrix internal coordinates and in the Cartesian coordinates, respectively.  $U_l^{\text{nei}(n)}$  is the quantum chemical potential energy obtained at the  $l$ -th neighboring configuration,  $\mathbf{X}_l^{\text{nei}(n)}$  among the nearest  $M$  neighboring configurations. Here, the superscript “nei( $n$ )” is used to emphasize the quantities are from the point belonging to the set of the neighboring configurations for the  $n$ -th data point. Although eq S1 is written for the case where interpolation is conducted on a single electronic state, extending for multistate cases is also straightforward.<sup>2</sup>

One can notice that the confidence radii thus calculated are nothing but the averages of the estimated values from the neighboring configurations. Thus, the confidence radii will likely be

more reliable as more neighboring configurations are considered, and they can be simultaneously updated with additional sampling of the interpolation data points. However, our earlier study showed that when the interpolation is conducted for a large molecule, there sometimes should be additional sampling of neighboring configurations to render the confidence radii reliable. In this work, to avoid an additional computational cost associated with that, we modified eq S1 as follows:

$$\text{crad}(n)^{-6} = \max \left\{ \frac{\left[ T_n(\mathbf{Z}_l^{\text{nei}(n)}) - U_l^{\text{nei}(n)} \right]^2}{E_{\text{tol}}^2 \left[ d_n(\mathbf{X}_l^{\text{nei}(n)}) \right]^6} \right\} \quad l = 1, 2, \dots, M \quad (\text{S2})$$

With the target-customized weighting coordinate defined in the main text, the equation can be further modified as

$$\text{crad}(n)^{-6} = \max \left\{ \frac{\left[ T_n(\mathbf{Z}_l^{\text{nei}(n)}) - U_l^{\text{nei}(n)} \right]^2}{E_{\text{tol}}^2 \left[ d'_n(\mathbf{X}_l^{\text{nei}(n)}, \mathbf{z}_l^{\text{nei}(n)}) \right]^6} \right\} \quad l = 1, 2, \dots, M \quad (\text{S3})$$

One may wonder that directly using eq S2 or S3 in dynamics simulations may potentially be harmful as these equations systematically underestimate the confidence radii by taking the maxima rather than the averages. However, we experienced that sensitively assigning the radii through these equations was particularly useful during our “static” calculations toward analyzing the effect of the weighting coordinates. For the values of  $M$  and  $E_{\text{tol}}$ , we choose  $M = 100$ , and  $E_{\text{tol}} = 1$  kJ/mol, similar with the earlier report.<sup>3</sup> The obtained radii were used to calculate the corresponding contour maps with the two-part weighting functions shown in Figure 5c of the main text.

## Supporting Tables

**Table S1.** Z-matrix internal coordinates adopted toward the interpolation.<sup>a</sup>

| Bonds                            | Angles                                            | Torsions                                                           |
|----------------------------------|---------------------------------------------------|--------------------------------------------------------------------|
| C <sub>2</sub> -C <sub>1</sub>   |                                                   |                                                                    |
| C <sub>3</sub> -C <sub>2</sub>   | C <sub>3</sub> -C <sub>2</sub> -C <sub>1</sub>    |                                                                    |
| C <sub>4</sub> -C <sub>3</sub>   | C <sub>4</sub> -C <sub>3</sub> -C <sub>2</sub>    | C <sub>4</sub> -C <sub>3</sub> -C <sub>2</sub> -C <sub>1</sub>     |
| C <sub>5</sub> -C <sub>4</sub>   | C <sub>5</sub> -C <sub>4</sub> -C <sub>3</sub>    | C <sub>5</sub> -C <sub>4</sub> -C <sub>3</sub> -C <sub>2</sub>     |
| C <sub>6</sub> -C <sub>5</sub>   | C <sub>6</sub> -C <sub>5</sub> -C <sub>4</sub>    | C <sub>6</sub> -C <sub>5</sub> -C <sub>4</sub> -C <sub>3</sub>     |
| H <sub>7</sub> -C <sub>1</sub>   | H <sub>7</sub> -C <sub>1</sub> -C <sub>2</sub>    | H <sub>7</sub> -C <sub>1</sub> -C <sub>2</sub> -C <sub>6</sub>     |
| H <sub>8</sub> -C <sub>6</sub>   | H <sub>8</sub> -C <sub>6</sub> -C <sub>5</sub>    | H <sub>8</sub> -C <sub>6</sub> -C <sub>5</sub> -C <sub>1</sub>     |
| H <sub>9</sub> -C <sub>3</sub>   | H <sub>9</sub> -C <sub>3</sub> -C <sub>2</sub>    | H <sub>9</sub> -C <sub>3</sub> -C <sub>2</sub> -C <sub>4</sub>     |
| H <sub>10</sub> -C <sub>4</sub>  | H <sub>10</sub> -C <sub>4</sub> -C <sub>5</sub>   | H <sub>10</sub> -C <sub>4</sub> -C <sub>5</sub> -C <sub>3</sub>    |
| C <sub>11</sub> -C <sub>5</sub>  | C <sub>11</sub> -C <sub>5</sub> -C <sub>4</sub>   | C <sub>11</sub> -C <sub>5</sub> -C <sub>4</sub> -C <sub>6</sub>    |
| C <sub>12</sub> -C <sub>11</sub> | C <sub>12</sub> -C <sub>11</sub> -C <sub>5</sub>  | C <sub>12</sub> -C <sub>11</sub> -C <sub>5</sub> -C <sub>4</sub>   |
| H <sub>13</sub> -C <sub>11</sub> | H <sub>13</sub> -C <sub>11</sub> -C <sub>12</sub> | H <sub>13</sub> -C <sub>11</sub> -C <sub>12</sub> -C <sub>5</sub>  |
| C <sub>14</sub> -C <sub>12</sub> | C <sub>14</sub> -C <sub>12</sub> -C <sub>11</sub> | C <sub>14</sub> -C <sub>12</sub> -C <sub>11</sub> -C <sub>5</sub>  |
| H <sub>15</sub> -C <sub>12</sub> | H <sub>15</sub> -C <sub>12</sub> -C <sub>11</sub> | H <sub>15</sub> -C <sub>12</sub> -C <sub>11</sub> -C <sub>14</sub> |
| O <sub>16</sub> -C <sub>14</sub> | O <sub>16</sub> -C <sub>14</sub> -C <sub>12</sub> | O <sub>16</sub> -C <sub>14</sub> -C <sub>12</sub> -C <sub>11</sub> |
| O <sub>17</sub> -C <sub>2</sub>  | O <sub>17</sub> -C <sub>2</sub> -C <sub>3</sub>   | O <sub>17</sub> -C <sub>2</sub> -C <sub>3</sub> -C <sub>1</sub>    |
| S <sub>18</sub> -C <sub>14</sub> | S <sub>18</sub> -C <sub>14</sub> -C <sub>12</sub> | S <sub>18</sub> -C <sub>14</sub> -C <sub>12</sub> -O <sub>16</sub> |
| C <sub>19</sub> -S <sub>18</sub> | C <sub>19</sub> -S <sub>18</sub> -C <sub>14</sub> | C <sub>19</sub> -S <sub>18</sub> -C <sub>14</sub> -O <sub>16</sub> |
| H <sub>20</sub> -C <sub>19</sub> | H <sub>20</sub> -C <sub>19</sub> -S <sub>18</sub> | H <sub>20</sub> -C <sub>19</sub> -S <sub>18</sub> -C <sub>14</sub> |
| H <sub>21</sub> -C <sub>19</sub> | H <sub>21</sub> -C <sub>19</sub> -S <sub>18</sub> | H <sub>21</sub> -C <sub>19</sub> -S <sub>18</sub> -C <sub>14</sub> |
| H <sub>22</sub> -C <sub>19</sub> | H <sub>22</sub> -C <sub>19</sub> -S <sub>18</sub> | H <sub>22</sub> -C <sub>19</sub> -S <sub>18</sub> -C <sub>14</sub> |

<sup>a</sup> Atom designations can be found in Figure 1 of the main text.

**Table S2.** RESP diabatic charges at the  $S_0$ -optimized geometry.

| atom <sup>a</sup> | diabatic atomic partial charge <sup>b</sup> |         |             |
|-------------------|---------------------------------------------|---------|-------------|
|                   | P state                                     | Q state | PQ coupling |
| C <sub>1</sub>    | -0.5179                                     | -0.2995 | 0.0602      |
| C <sub>2</sub>    | 0.6994                                      | 0.8495  | -0.0560     |
| C <sub>3</sub>    | -0.5661                                     | -0.4247 | 0.0243      |
| C <sub>4</sub>    | -0.1132                                     | -0.0028 | -0.0761     |
| C <sub>5</sub>    | -0.0891                                     | 0.1645  | 0.1267      |
| C <sub>6</sub>    | -0.1764                                     | -0.2069 | -0.0649     |
| H <sub>7</sub>    | 0.1652                                      | 0.1266  | -0.0048     |
| H <sub>8</sub>    | 0.1481                                      | 0.1334  | 0.0092      |
| H <sub>9</sub>    | 0.1742                                      | 0.1511  | 0.0000      |
| H <sub>10</sub>   | 0.1322                                      | 0.0986  | 0.0116      |
| C <sub>11</sub>   | 0.0756                                      | 0.0250  | -0.0835     |
| C <sub>12</sub>   | -0.4232                                     | -1.0386 | 0.1047      |
| H <sub>13</sub>   | 0.0874                                      | 0.0934  | -0.0094     |
| C <sub>14</sub>   | 0.8351                                      | 0.6803  | -0.0512     |
| H <sub>15</sub>   | 0.2238                                      | 0.2908  | -0.0128     |
| O <sub>16</sub>   | -0.5802                                     | -0.6552 | 0.0081      |
| O <sub>17</sub>   | -0.8186                                     | -0.6905 | 0.0104      |
| S <sub>18</sub>   | -0.3927                                     | -0.4343 | 0.0005      |
| C <sub>19</sub>   | 0.0119                                      | 0.0257  | 0.0067      |
| H <sub>20</sub>   | 0.0347                                      | 0.0300  | -0.0007     |
| H <sub>21</sub>   | 0.0550                                      | 0.0535  | -0.0022     |
| H <sub>22</sub>   | 0.0347                                      | 0.0299  | -0.0007     |

<sup>a</sup> Atom designations can be found in Figure 1 of the main text.

<sup>b</sup> Diabatic state designations can be found in Figure 2b of the main text.

**Table S3.** Detailed simulation conditions of the restrained sampling for the IM database.

| Bin index | Initial [ $\alpha$ , $\beta$ ] | Restrained angle <sup>a</sup> |                    |
|-----------|--------------------------------|-------------------------------|--------------------|
| 6         | [70, 180]                      | $\alpha$                      |                    |
| 7         | [50, 180]                      |                               |                    |
| 8         | [30, 180]                      |                               |                    |
| 9         | [10, 180]                      |                               |                    |
| 10        | [-10, 180]                     |                               |                    |
| 11        | [-30, 180]                     |                               |                    |
| 12        | [-50, 180]                     |                               |                    |
| 13        | [-70, 180]                     |                               |                    |
| 14        | [0, 250]                       |                               | $\beta$            |
| 15        | [0, 230]                       |                               |                    |
| 16        | [0, 130]                       |                               |                    |
| 17        | [0, 110]                       |                               |                    |
| 18        | [0, 210]                       |                               | $\alpha$ , $\beta$ |
| 19        | [0, 190]                       |                               |                    |
| 20        | [0, 170]                       |                               |                    |
| 21        | [0, 150]                       |                               |                    |

<sup>a</sup>All the restraining centers were the same as the initial angle values. The restraining force constant was 200 kJ/mol/rad<sup>2</sup>, excepting the restraint on  $\alpha$  from bin indexes 18 – 21, where the force constant was 100 kJ/mol/rad<sup>2</sup> instead.

**Table S4.** Pearson's correlation coefficients between the squared effective distance from the closest data point and the state-averaged interpolation error for all bond stretching coordinates.<sup>a</sup>

| Index | Bond <sup>b</sup> | Coefficient |
|-------|-------------------|-------------|
| 1     | C1-C2             | -0.0417     |
| 2     | C1-C6             | -0.0017     |
| 3     | C1-H7             | 0.0253      |
| 4     | C2-C3             | -0.0343     |
| 5     | C2-O17            | 0.3326      |
| 6     | C3-C4             | 0.1368      |
| 7     | C3-H9             | 0.0264      |
| 8     | C4-C5             | 0.0351      |
| 9     | C4-H10            | 0.0289      |
| 10    | C5-C6             | 0.0135      |
| 11    | C5-C11            | 0.3074      |
| 12    | C6-H8             | 0.0548      |
| 13    | C11-C12           | 0.2383      |
| 14    | C11-H13           | 0.0222      |
| 15    | C12-C14           | 0.1012      |
| 16    | C12-H15           | -0.0011     |
| 17    | C14-O16           | -0.0568     |
| 18    | C14-S18           | -0.1096     |
| 19    | S18-C19           | 0.1341      |
| 20    | C19-H20           | 0.0594      |
| 21    | C19-H21           | 0.0406      |
| 22    | C19-H22           | 0.0630      |

<sup>a</sup> The effective distance was calculated as in eq 9 of the main text without any tolerance parameter, and the state-averaged interpolation error was defined as the RMS value of the errors from both S<sub>0</sub> and S<sub>1</sub> states. Each correlation coefficient was obtained with the test configurations.

<sup>b</sup> Atom designations can be found in Figure 1 of the main text.

**Table S5.** Pearson's correlation coefficients between the squared effective distance from the closest data point and the state-averaged interpolation error for all angle bending coordinates.<sup>a</sup>

| Index | Angle <sup>b</sup>                                | Coefficient | Index | Angle <sup>b</sup>                                | Coefficient |
|-------|---------------------------------------------------|-------------|-------|---------------------------------------------------|-------------|
| 1     | C <sub>1</sub> -C <sub>2</sub> -C <sub>3</sub>    | 0.2362      | 26    | C <sub>14</sub> -C <sub>12</sub> -H <sub>15</sub> | -0.0713     |
| 2     | C <sub>1</sub> -C <sub>2</sub> -O <sub>17</sub>   | 0.0810      | 27    | C <sub>14</sub> -S <sub>18</sub> -C <sub>19</sub> | 0.2325      |
| 3     | C <sub>1</sub> -C <sub>6</sub> -C <sub>5</sub>    | 0.0272      | 28    | O <sub>16</sub> -C <sub>14</sub> -S <sub>18</sub> | 0.2454      |
| 4     | C <sub>1</sub> -C <sub>6</sub> -C <sub>8</sub>    | -0.0088     | 29    | S <sub>18</sub> -C <sub>19</sub> -H <sub>20</sub> | 0.0834      |
| 5     | C <sub>2</sub> -C <sub>1</sub> -C <sub>6</sub>    | 0.0874      | 30    | S <sub>18</sub> -C <sub>19</sub> -H <sub>21</sub> | -0.0429     |
| 6     | C <sub>2</sub> -C <sub>1</sub> -H <sub>7</sub>    | 0.0643      | 31    | S <sub>18</sub> -C <sub>19</sub> -H <sub>22</sub> | 0.0239      |
| 7     | C <sub>2</sub> -C <sub>3</sub> -C <sub>4</sub>    | 0.1990      | 32    | H <sub>20</sub> -C <sub>19</sub> -H <sub>21</sub> | 0.0119      |
| 8     | C <sub>2</sub> -C <sub>3</sub> -H <sub>9</sub>    | 0.0922      | 33    | H <sub>20</sub> -C <sub>19</sub> -H <sub>22</sub> | 0.0360      |
| 9     | C <sub>3</sub> -C <sub>2</sub> -O <sub>17</sub>   | 0.1600      | 34    | H <sub>21</sub> -C <sub>19</sub> -H <sub>22</sub> | -0.0722     |
| 10    | C <sub>3</sub> -C <sub>4</sub> -C <sub>5</sub>    | -0.0053     |       |                                                   |             |
| 11    | C <sub>3</sub> -C <sub>4</sub> -H <sub>10</sub>   | 0.0625      |       |                                                   |             |
| 12    | C <sub>4</sub> -C <sub>3</sub> -H <sub>9</sub>    | -0.0366     |       |                                                   |             |
| 13    | C <sub>4</sub> -C <sub>5</sub> -C <sub>6</sub>    | 0.1594      |       |                                                   |             |
| 14    | C <sub>4</sub> -C <sub>5</sub> -C <sub>11</sub>   | 0.0934      |       |                                                   |             |
| 15    | C <sub>5</sub> -C <sub>4</sub> -H <sub>10</sub>   | 0.0942      |       |                                                   |             |
| 16    | C <sub>5</sub> -C <sub>6</sub> -H <sub>8</sub>    | 0.0721      |       |                                                   |             |
| 17    | C <sub>5</sub> -C <sub>11</sub> -C <sub>12</sub>  | 0.0490      |       |                                                   |             |
| 18    | C <sub>5</sub> -C <sub>11</sub> -H <sub>13</sub>  | 0.1095      |       |                                                   |             |
| 19    | C <sub>6</sub> -C <sub>1</sub> -H <sub>7</sub>    | 0.0205      |       |                                                   |             |
| 20    | C <sub>6</sub> -C <sub>5</sub> -C <sub>11</sub>   | 0.0900      |       |                                                   |             |
| 21    | C <sub>11</sub> -C <sub>12</sub> -C <sub>14</sub> | -0.0066     |       |                                                   |             |
| 22    | C <sub>11</sub> -C <sub>12</sub> -H <sub>15</sub> | 0.0562      |       |                                                   |             |
| 23    | C <sub>12</sub> -C <sub>11</sub> -H <sub>13</sub> | -0.0096     |       |                                                   |             |
| 24    | C <sub>12</sub> -C <sub>14</sub> -O <sub>16</sub> | 0.2134      |       |                                                   |             |
| 25    | C <sub>12</sub> -C <sub>14</sub> -S <sub>18</sub> | 0.0695      |       |                                                   |             |

<sup>a</sup> The effective distance was calculated as in eq 9 of the main text without any tolerance parameter, and the state-averaged interpolation error was defined as the RMS value of the errors from both S<sub>0</sub> and S<sub>1</sub> states. Each correlation coefficient was obtained with the test configurations.

<sup>b</sup> Atom designations can be found in Figure 1 of the main text.



**Table S6.** Pearson's correlation coefficients between the squared effective distance from the closest data point and the state-averaged interpolation error for all proper dihedral coordinates.<sup>a</sup>

| Index | Dihedral Angle <sup>b</sup>                                       | Coefficient | Index | Dihedral Angle <sup>b</sup>                                        | Coefficient |
|-------|-------------------------------------------------------------------|-------------|-------|--------------------------------------------------------------------|-------------|
| 1     | C <sub>1</sub> -C <sub>2</sub> -C <sub>3</sub> -C <sub>4</sub>    | 0.0595      | 26    | H <sub>7</sub> -C <sub>1</sub> -C <sub>6</sub> -H <sub>8</sub>     | 0.0416      |
| 2     | C <sub>1</sub> -C <sub>2</sub> -C <sub>3</sub> -H <sub>9</sub>    | 0.0800      | 27    | H <sub>8</sub> -C <sub>6</sub> -C <sub>5</sub> -C <sub>11</sub>    | 0.0153      |
| 3     | C <sub>1</sub> -C <sub>6</sub> -C <sub>5</sub> -C <sub>4</sub>    | 0.1203      | 28    | H <sub>9</sub> -C <sub>3</sub> -C <sub>2</sub> -O <sub>17</sub>    | 0.0643      |
| 4     | C <sub>1</sub> -C <sub>6</sub> -C <sub>5</sub> -C <sub>11</sub>   | 0.0425      | 29    | H <sub>9</sub> -C <sub>3</sub> -C <sub>4</sub> -H <sub>10</sub>    | 0.0710      |
| 5     | C <sub>2</sub> -C <sub>1</sub> -C <sub>6</sub> -C <sub>5</sub>    | 0.0841      | 30    | H <sub>10</sub> -C <sub>4</sub> -C <sub>5</sub> -C <sub>11</sub>   | 0.0125      |
| 6     | C <sub>2</sub> -C <sub>1</sub> -C <sub>6</sub> -H <sub>8</sub>    | 0.0095      | 31    | C <sub>11</sub> -C <sub>12</sub> -C <sub>14</sub> -O <sub>16</sub> | 0.0279      |
| 7     | C <sub>2</sub> -C <sub>3</sub> -C <sub>4</sub> -C <sub>5</sub>    | 0.2057      | 32    | C <sub>11</sub> -C <sub>12</sub> -C <sub>14</sub> -S <sub>18</sub> | 0.1322      |
| 8     | C <sub>2</sub> -C <sub>3</sub> -C <sub>4</sub> -H <sub>10</sub>   | 0.0316      | 33    | C <sub>12</sub> -C <sub>14</sub> -S <sub>18</sub> -C <sub>19</sub> | 0.1420      |
| 9     | C <sub>3</sub> -C <sub>4</sub> -C <sub>5</sub> -C <sub>6</sub>    | 0.2331      | 34    | H <sub>13</sub> -C <sub>11</sub> -C <sub>12</sub> -C <sub>14</sub> | 0.2962      |
| 10    | C <sub>3</sub> -C <sub>4</sub> -C <sub>5</sub> -C <sub>11</sub>   | 0.1383      | 35    | H <sub>13</sub> -C <sub>11</sub> -C <sub>12</sub> -H <sub>15</sub> | 0.3723      |
| 11    | C <sub>4</sub> -C <sub>3</sub> -C <sub>2</sub> -O <sub>17</sub>   | 0.0682      | 36    | C <sub>14</sub> -S <sub>18</sub> -C <sub>19</sub> -H <sub>20</sub> | 0.1427      |
| 12    | C <sub>4</sub> -C <sub>5</sub> -C <sub>6</sub> -H <sub>8</sub>    | 0.0627      | 37    | C <sub>14</sub> -S <sub>18</sub> -C <sub>19</sub> -H <sub>21</sub> | 0.1568      |
| 13    | C <sub>4</sub> -C <sub>5</sub> -C <sub>11</sub> -C <sub>12</sub>  | -0.0810     | 38    | C <sub>14</sub> -S <sub>18</sub> -C <sub>19</sub> -H <sub>22</sub> | 0.0944      |
| 14    | C <sub>4</sub> -C <sub>5</sub> -C <sub>11</sub> -H <sub>13</sub>  | 0.2084      | 39    | H <sub>15</sub> -C <sub>12</sub> -C <sub>14</sub> -O <sub>16</sub> | 0.2133      |
| 15    | C <sub>5</sub> -C <sub>4</sub> -C <sub>3</sub> -H <sub>9</sub>    | 0.0904      | 40    | H <sub>15</sub> -C <sub>12</sub> -C <sub>14</sub> -S <sub>18</sub> | 0.1061      |
| 16    | C <sub>5</sub> -C <sub>11</sub> -C <sub>12</sub> -C <sub>14</sub> | 0.1245      | 41    | O <sub>16</sub> -C <sub>14</sub> -S <sub>18</sub> -S <sub>19</sub> | 0.1605      |
| 17    | C <sub>5</sub> -C <sub>11</sub> -C <sub>12</sub> -H <sub>15</sub> | 0.2780      |       |                                                                    |             |
| 18    | C <sub>6</sub> -C <sub>1</sub> -C <sub>2</sub> -C <sub>3</sub>    | 0.0883      |       |                                                                    |             |
| 19    | C <sub>6</sub> -C <sub>1</sub> -C <sub>2</sub> -O <sub>17</sub>   | -0.0262     |       |                                                                    |             |
| 20    | C <sub>6</sub> -C <sub>5</sub> -C <sub>4</sub> -H <sub>10</sub>   | 0.1237      |       |                                                                    |             |
| 21    | C <sub>6</sub> -C <sub>5</sub> -C <sub>11</sub> -C <sub>12</sub>  | 0.0449      |       |                                                                    |             |
| 22    | C <sub>6</sub> -C <sub>5</sub> -C <sub>11</sub> -H <sub>13</sub>  | 0.2163      |       |                                                                    |             |
| 23    | H <sub>7</sub> -C <sub>1</sub> -C <sub>2</sub> -C <sub>3</sub>    | 0.0481      |       |                                                                    |             |
| 24    | H <sub>7</sub> -C <sub>1</sub> -C <sub>2</sub> -O <sub>17</sub>   | 0.0874      |       |                                                                    |             |
| 25    | H <sub>7</sub> -C <sub>1</sub> -C <sub>6</sub> -C <sub>5</sub>    | 0.0313      |       |                                                                    |             |

<sup>a</sup> The effective distance was calculated as in eq 9 of the main text without any tolerance parameter, and the state-averaged interpolation error was defined as the RMS value of the errors from both S<sub>0</sub> and S<sub>1</sub> states. Each correlation coefficient was obtained with the test configurations.

<sup>b</sup> Atom designations can be found in Figure 1 of the main text.

**Table S7.** Pearson's correlation coefficients between the squared effective distance from the closest data point and the state-averaged interpolation error for the selected improper dihedral coordinates.<sup>a</sup>

| Index | Dihedral Angle <sup>b</sup>                                        | Coefficient |
|-------|--------------------------------------------------------------------|-------------|
| 1     | C <sub>1</sub> -C <sub>3</sub> -C <sub>2</sub> -O <sub>17</sub>    | 0.0983      |
| 2     | C <sub>1</sub> -C <sub>5</sub> -C <sub>6</sub> -H <sub>8</sub>     | -0.0034     |
| 3     | C <sub>2</sub> -C <sub>4</sub> -C <sub>3</sub> -H <sub>9</sub>     | 0.1179      |
| 4     | C <sub>3</sub> -C <sub>5</sub> -C <sub>4</sub> -H <sub>10</sub>    | 0.0390      |
| 5     | C <sub>4</sub> -C <sub>6</sub> -C <sub>5</sub> -H <sub>11</sub>    | 0.0472      |
| 6     | C <sub>5</sub> -C <sub>12</sub> -C <sub>11</sub> -H <sub>13</sub>  | 0.2367      |
| 7     | H <sub>7</sub> -C <sub>1</sub> -C <sub>6</sub> -C <sub>2</sub>     | 0.0584      |
| 8     | C <sub>12</sub> -O <sub>16</sub> -C <sub>14</sub> -S <sub>18</sub> | 0.2310      |
| 9     | C <sub>14</sub> -C <sub>11</sub> -C <sub>12</sub> -H <sub>15</sub> | 0.2163      |

<sup>a</sup> The effective distance was calculated as in eq 9 of the main text without any tolerance parameter, and the state-averaged interpolation error was defined as the RMS value of the errors from both S<sub>0</sub> and S<sub>1</sub> states. Each correlation coefficient was obtained with the test configurations.

<sup>b</sup> Atom designations can be found in Figure 1 of the main text.

**Table S8.** RMS errors in interpolated energies (eV) for the hopping geometries from IM/MM NAMD simulations.

| Level of theory        | S <sub>0</sub> state | S <sub>1</sub> state | S <sub>0</sub> -S <sub>1</sub> gap |
|------------------------|----------------------|----------------------|------------------------------------|
| SA-CASSCF              | 0.074                | 0.098                | 0.056                              |
| $\alpha$ -CASSCF       | 0.042                | 0.044                | 0.020                              |
| MS-CASPT2 <sup>a</sup> | 0.131                | 0.146                | 0.033                              |

<sup>a</sup>In the case of the MS-CASPT2, the dual-interpolation scheme was adopted, with Hessians from  $\alpha$ -CASSCF.

## Supporting Figures

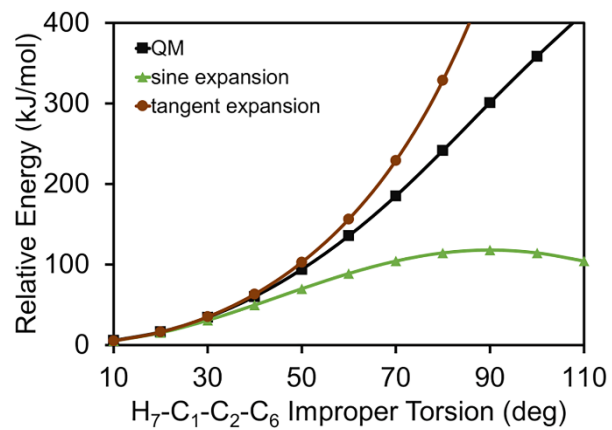

**Figure S1.** Taylor expansions calculated around the  $S_0$ -optimized geometry using different displacement function for improper torsions. The reference quantum chemical calculation results with SA2-CAS(4,3)SCF are also shown for comparison.

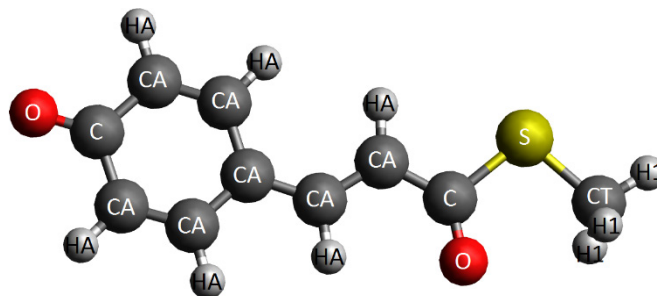

**Figure S2.** Assigned AMBER99SB bond atom types<sup>4</sup> for the stabilizer function of the PYP chromophore.

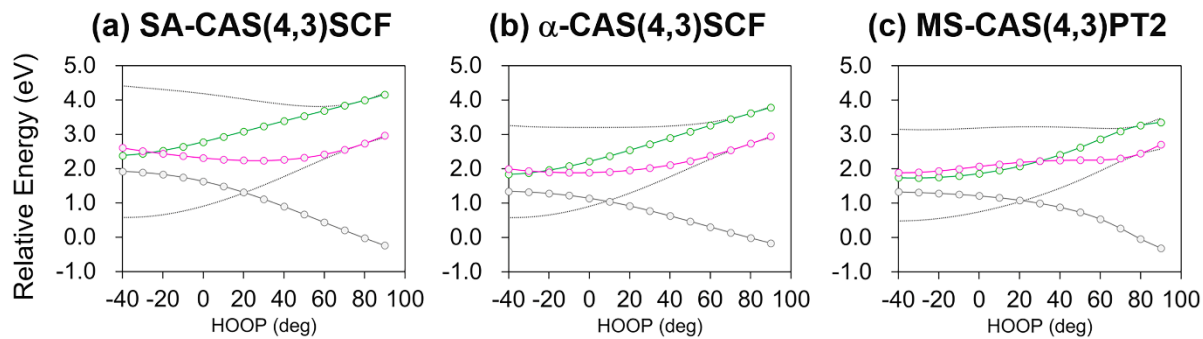

**Figure S3.** Diabatic potential energy curves along the HOOP coordinate, obtained with (a) SA-CASSCF, (b)  $\alpha$ -CASSCF, and (c) MS-CASPT2 levels of theories. The initial geometry (corresponding to HOOP = 0 deg) was generated from the  $S_0$ -optimized one by rigidly rotating the  $\beta$  torsional angle to 130 deg. Other details are the same as in Figure 3 of the main text.

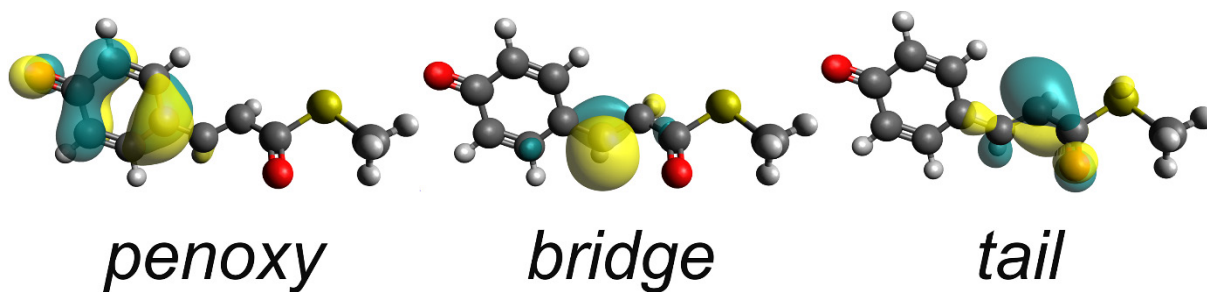

**Figure S4.** Boys-localized active space orbitals in the HOOP-twisted geometry. The geometry was generated from the  $S_0$ -optimized one by rigidly rotating  $\beta$  and HOOP torsional angles into 130 deg and 90 deg, respectively. The definition of  $\beta$  and the HOOP torsional angle can be found in Figure 1 of the main text.

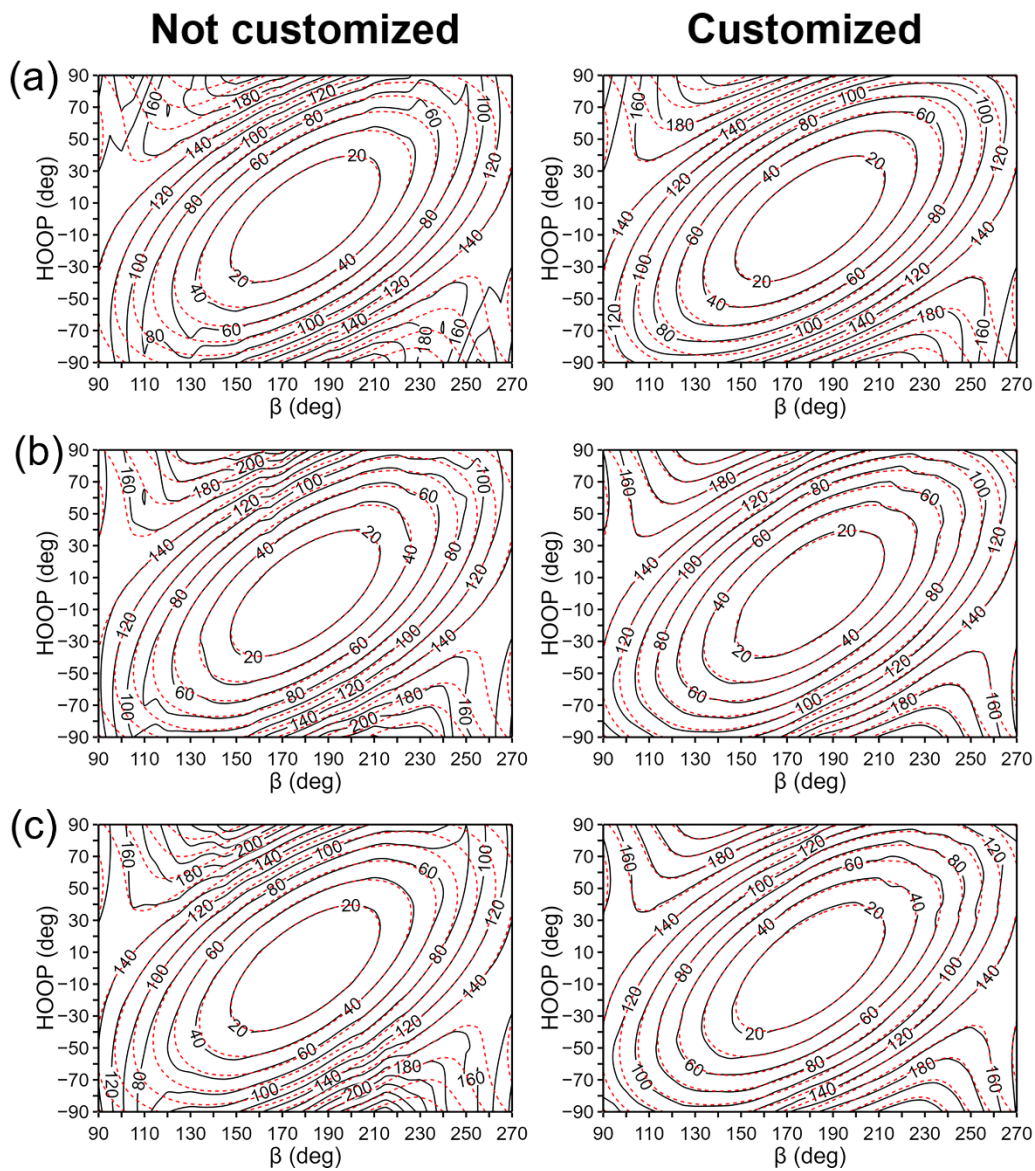

**Figure S5.** Contour plots of the interpolated (solid black) and the reference QM (dashed red)  $S_0$  PES's in kJ/mol around the Franck-Condon region, without using the target-customized weighting coordinate (left panels) and with using it (right panels). Other details are the same as in Figure 5 of the main text.



## Supporting References

1. R. P. A. Bettens and M. A. Collins, *J. Chem. Phys.*, 1999, **111**, 816-826.
2. C. R. Evenhuis, X. Lin, D. H. Zhang, D. Yarkony and M. A. Collins, *J. Chem. Phys.*, 2005, **123**, 134110.
3. C. W. Kim and Y. M. Rhee, *J. Chem. Theory Comput.*, 2016, **12**, 5235-5246.
4. V. Hornak, R. Abel, A. Okur, B. Strockbine, A. Roitberg and C. Simmerling, *Proteins: Struct. Funct. Bioinform.*, 2006, **65**, 712-725.
